# Supplementary material for: Single neurons and networks in the mouse claustrum integrate input from widespread cortical sources
Source: eLife. 2025 Jul 16;13:RP98002. doi: 10.7554/eLife.98002 (PMC12266724; doi:10.7554/eLife.98002)
Supplement: Supplementary file 1. — All values reported here as the mean ± the standard deviation. Abbreviations: Rin - input resistance, RMP - resting membrane potential, Thre. - spike threshold, Rheo. - rheobase current, fAHP - fast afterhyperpolarization potential, ADP - afterdepolarization potential, AP1/2 - action potential half-width, Freq. - maximum recorded spike frequency, APmax - maximum spike height at rheobase, Spkdelay - delay to spike onset. [file elife-98002-supp1.xlsx]

## Sheet: Sheet1
Metric	E1	E2	FS	HR	LT	IR
R_IN (MΩ)	362 ± 143	291 ± 124	341 ± 189	110 ± 19	669 ± 298	231 ± 119
RMP (mV)	-69.5 ± 5.0	-70.5 ± 4.9	-66.0 ± 5.6	-75.4 ± 6.3	-66.5 ± 4.0	-69.7 ± 5.2
Thre. (mV)	-38.7 ± 5.2	-38.1 ± 4.5	-41.2 ± 7.6	-35.6 ± 3.8	-40.9 ± 5.6	-37.5 ± 5.5
Rheo (pA)	76 ± 38	97 ± 35	97 ± 55	298 ± 65	36 ± 12	163 ± 96
fAHP (mV)	-12.1 ± 3.5	-7.9 ± 3.8	-18.2 ± 4.5	-9.3 ± 3.5	-13.2 ± 5.8	-8.7 ± 3.1
ADP (mV)	0.5 ± 1.6	1.9 ± 2.3	N/A	1.4 ± 2.2	N/A	N/A
AP_1/2 (ms)	1.8 ± 0.4	1.8 ± 0.5	0.8 ± 0.3	1.7 ± 0.4	1.7 ± 0.6	1.9 ± 0.6
Freq. (Hz)	38.6 ± 20.0	33.4 ± 12.7	93.2 ± 44.0	38.5 ± 10.8	28.8 ± 9.6	6.0 ± 4.9
AP_max (mV)	76.8 ± 10.3	76.2 ± 9.3	75.2 ± 11.8	81.8 ± 6.7	75.9 ± 9.2	83.0 ± 6.7
Spk_Delay (ms)	194.5 ± 105.0	144.9 ± 81.7	24.8 ± 42.3	127.9 ± 87.0	99.4 ± 65.2	70.2 ± 75.1
R_a (MΩ)	28.1 ± 5.1	27.2 ± 4.0	25.8 ± 4.0	21.9 ± 4.8	27.6 ± 5.4	24.8 ± 5.0
