# Supplementary material for: Single neurons and networks in the mouse claustrum integrate input from widespread cortical sources
Source: eLife. 2025 Jul 16;13:RP98002. doi: 10.7554/eLife.98002 (PMC12266724; doi:10.7554/eLife.98002)
Supplement: Supplementary file 2. — All values reported here as the mean ± the standard deviation. Abbreviations: #Den. - number of primary dendrites, #Nodes - number of dendritic nodes,<Den.> - average dendritic length, Max Den.order - the highest order dendrite,<Seg.> - average dendritic segment length, ND - node density, Den.max - longest dendrite, Len.max - the polar bin of the longest dendrite. [file elife-98002-supp2.xlsx]

## Sheet: Sheet1
Metric	E1	E2	FS	HR	LT	IR
# Den.	5 ± 2	6 ± 3	4 ± 2	6 ± 1	4 ± 2	6 ± 2
# Nodes	15 ± 8	15 ± 8	12 ± 7	29 ± 15	11 ± 6	16 ± 11
Σ(Den.) (µm)	1763.3 ± 869.2	2159.1 ± 1185.0	1238.3 ± 559.6	2642.3 ± 1342.2	1754.8 ± 965.8	2263.7 ± 1473.4
<Den.> (µm)	385.0 ± 263.9	407.3 ± 292.2	314.4 ± 144.0	409.3 ± 157.7	416.3 ± 235.4	519.9 ± 521.2
Den. Highest Order	7 ± 2	7 ± 3	5 ± 2	9 ± 2	5 ± 1	7 ± 3
Den. Seg. Tor.	1.2 ± 0.1	1.2 ± 0.1	1.1 ± 0.0	1.3 ± 0.2	1.1 ± 0.0	1.0 ± 0.2
<Den. Seg. Len.> (µm)	54.2 ± 26.7	50.8 ± 19.3	46.5 ± 11.5	39.6 ± 6.5	68.1 ± 28.5	58.4 ± 20.7
Node Density (n/sholl)	3.5 ± 2.4	4.6 ± 7.7	3.0 ± 2.2	7.2 ± 5.5	2.4 ± 1.8	2.9 ± 1.9
Den._max (µm)	228.8 ± 128.5	220.5 ± 103.3	187.5 ± 76.3	210.0 ± 116.8	279.1 ± 126.2	284.0 ± 134.6
Len._max (°)	200 ± 80	190 ± 90	180 ± 120	220 ± 60	160 ± 110	180 ± 120
