# Supplementary material for: Single neurons and networks in the mouse claustrum integrate input from widespread cortical sources
Source: eLife. 2025 Jul 16;13:RP98002. doi: 10.7554/eLife.98002 (PMC12266724; doi:10.7554/eLife.98002)
Supplement: Supplementary file 3. — Values here are reported as the number of responsive neurons of a given type divided by the total number that type recorded in all optogenetics experiments involving inputs from a given cortex. Entries with * indicate experiments in which <4 neurons of that cell type were recorded. [file elife-98002-supp3.xlsx]

## Sheet: Sheet1
Cell Type	ORB	PL	ACA	MOp	AUDd	VISam	ENTI
E1	21.4 (3/14)	91.7 (11/12)	66.7 (12/18)	14.2 (1/7)	0.00 (0/2)*	50.0 (1/2)*	0.00 (0/7)
E2	45.2 (28/62)	93.3 (28/30)	86.1 (68/79)	31.8 (7/22)			38.1 (8/21)
FS	80.0 (4/5)	100 (4/4)	90.0 (9/10)	25.0 (1/4)	50.0 (1/2)*	50.0 (1/2)*	80.0 (4/5)
HR	0.00 (0/1)*		50.0 (2/4)*		0.00 (0/5)*	100 (5/5)	33.3 (1/3)*
LT	44.4 (4/9)	0.00 (0/3)	66.6 (8/12)	0.00 (0/3)	0.00 (0/3)*	0.00 (0/3)*	33.3 (1/3)*
IR	0.0 (0/6)		100 (6/6)
